# Supplementary material
Source: PubMed Central journal article supplement (PMC3978303)

Suppl. Figure 1

A

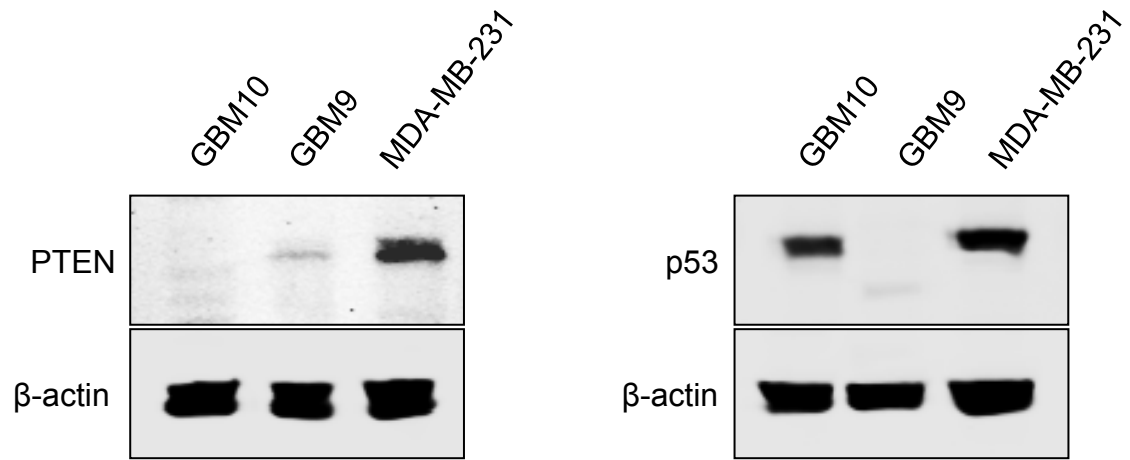

B

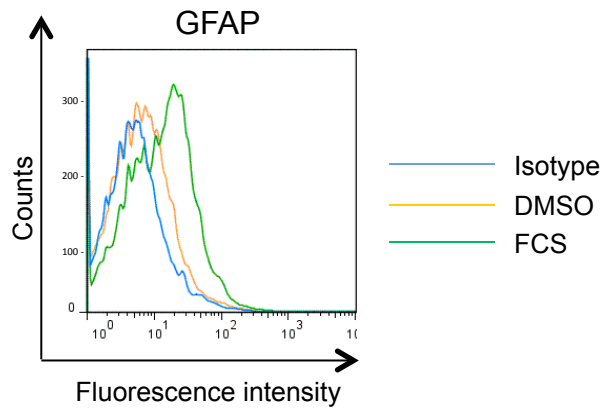

C

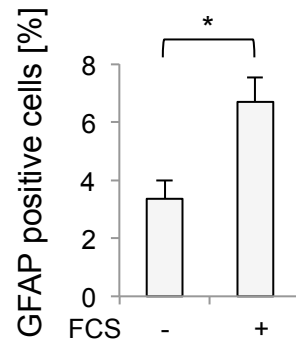

D

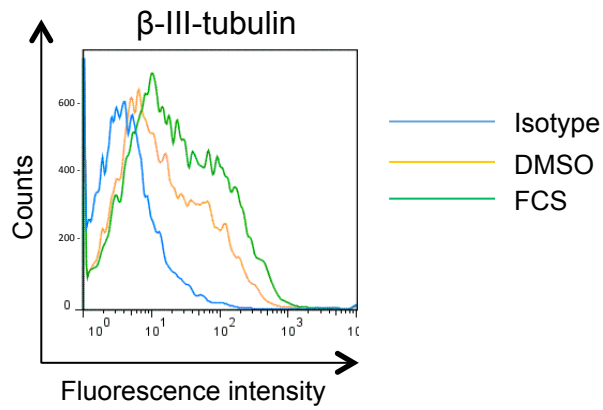

E

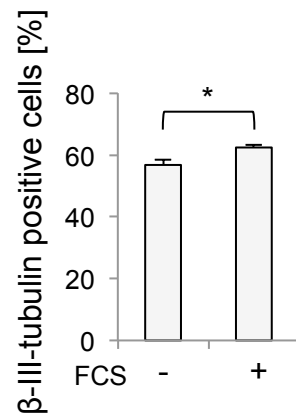

Suppl. Figure 2

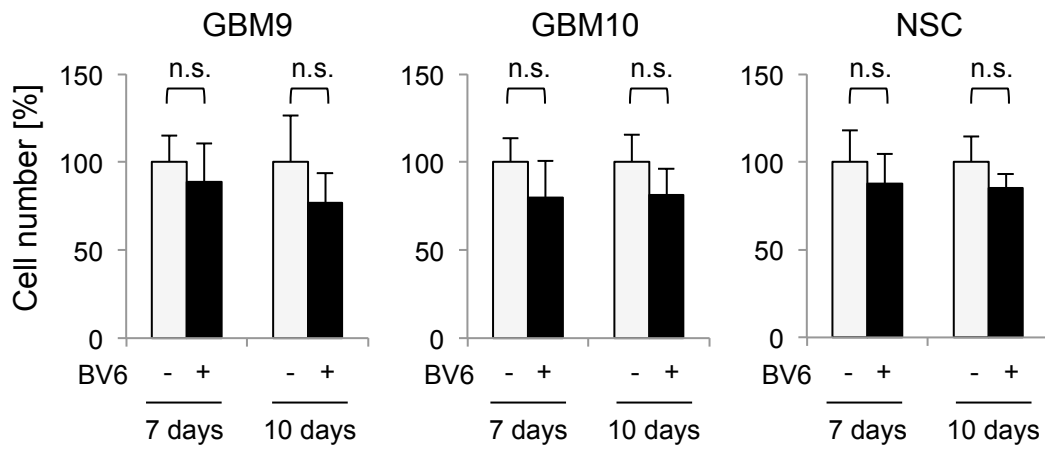

Suppl. Figure 3

A

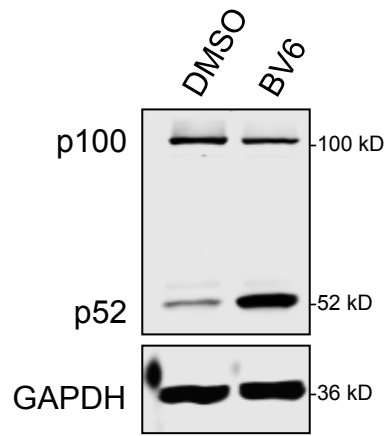

Suppl. Figure 4

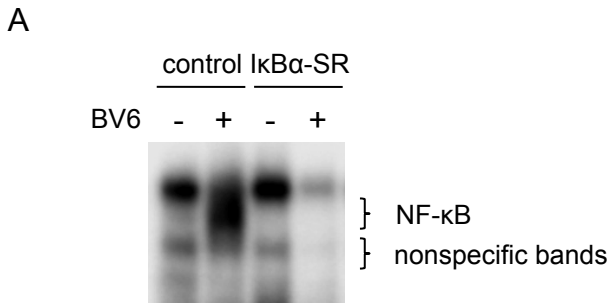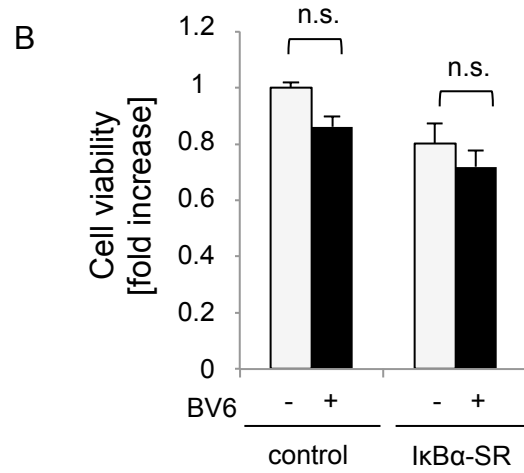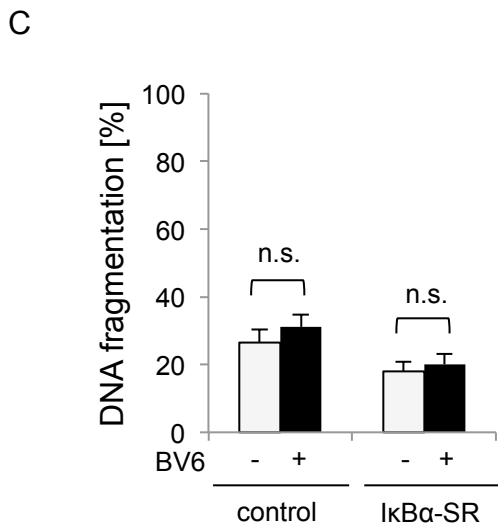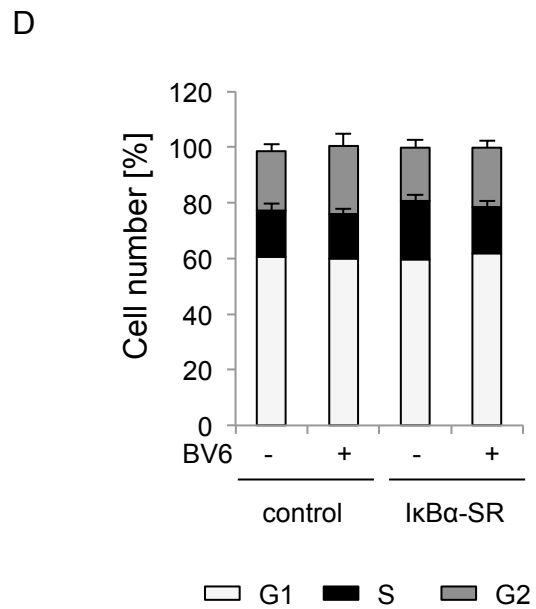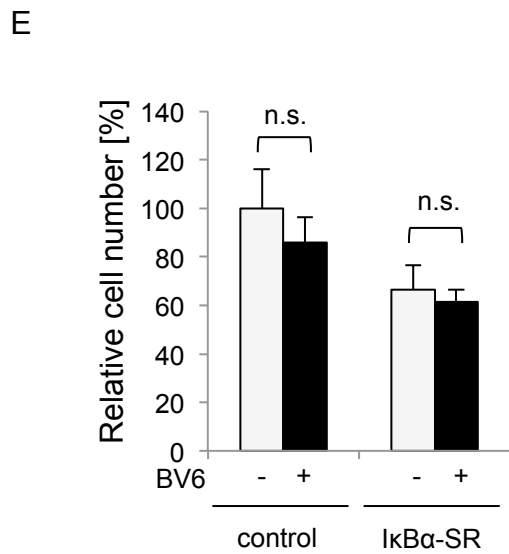

Suppl. Figure 5

A

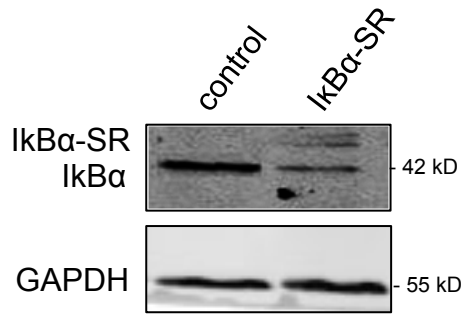

B

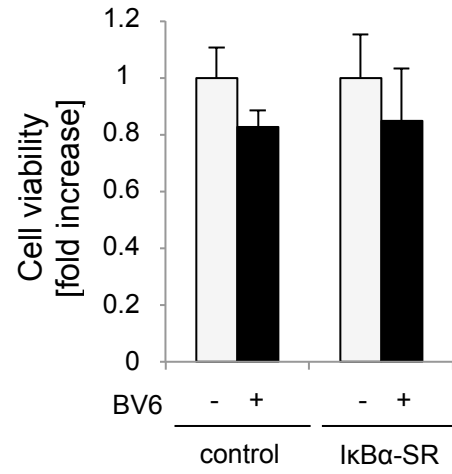

C

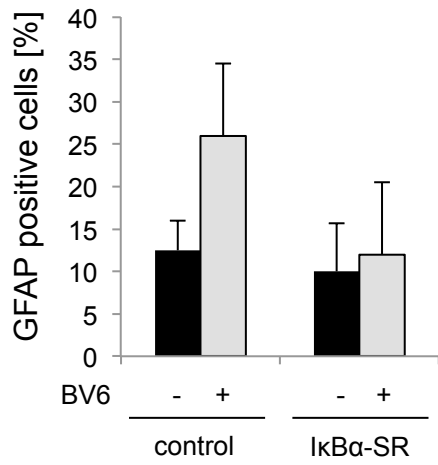

Suppl. Figure 6

A

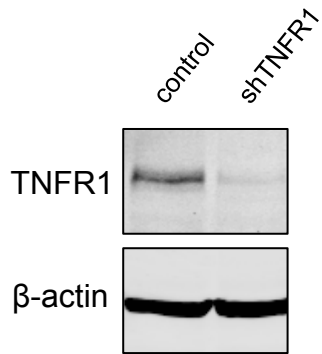

B

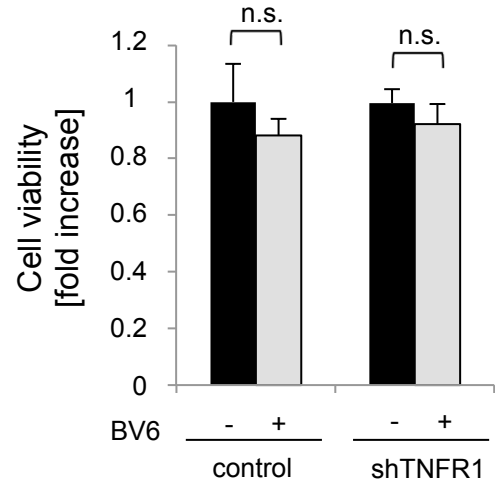

C

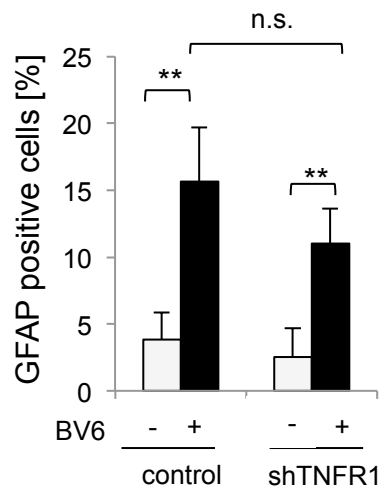

Suppl. Figure 7

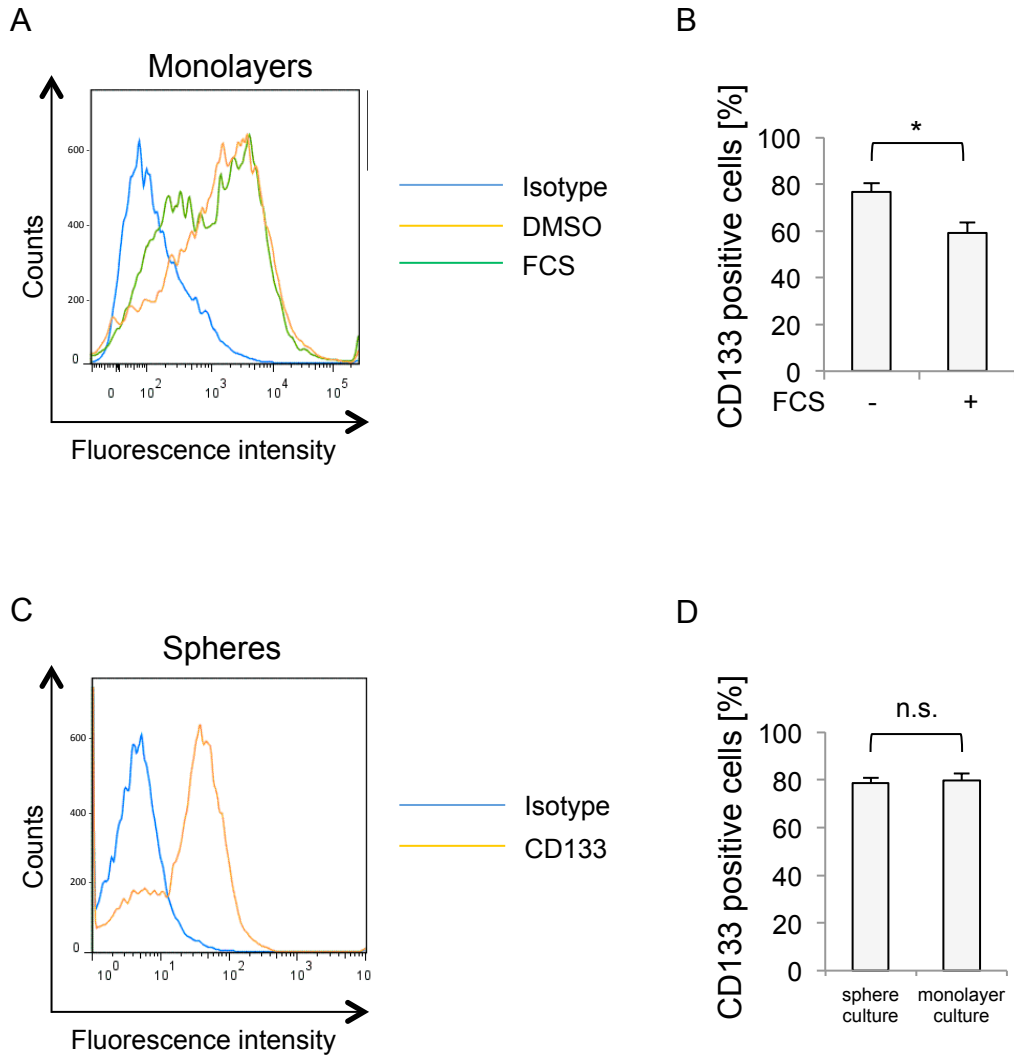

Suppl. Figure 8

A

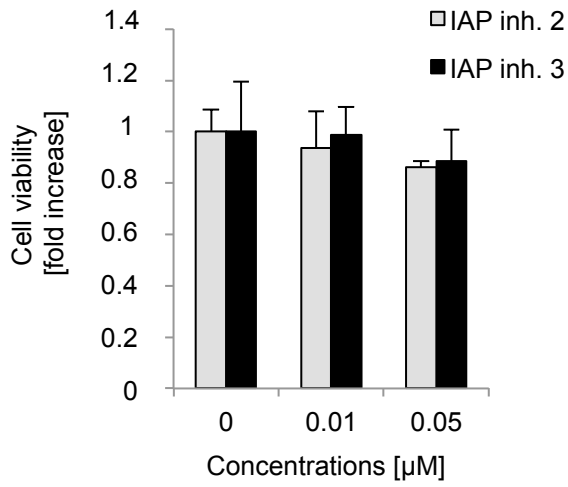

B

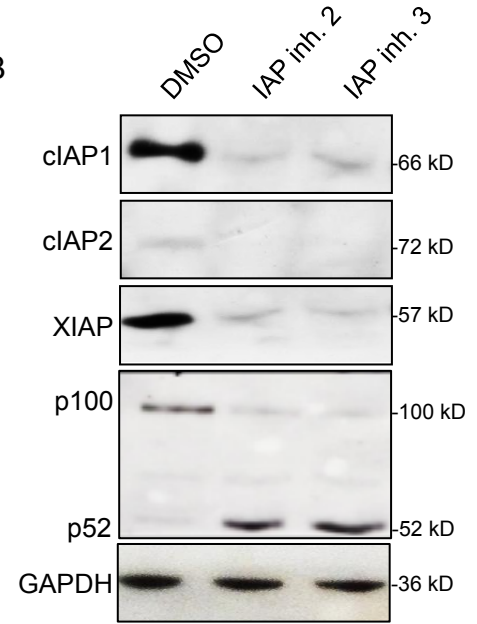

C

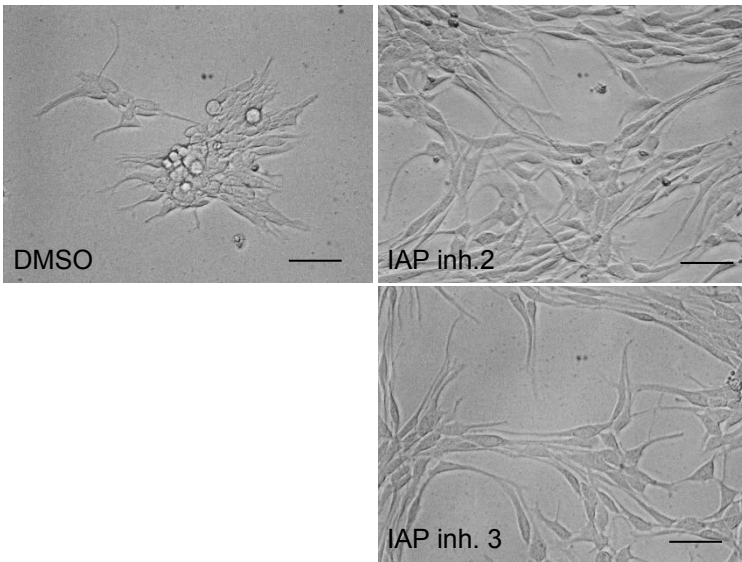

D

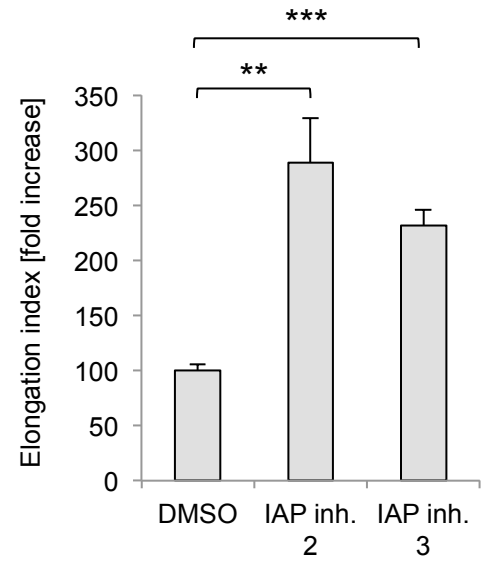

E

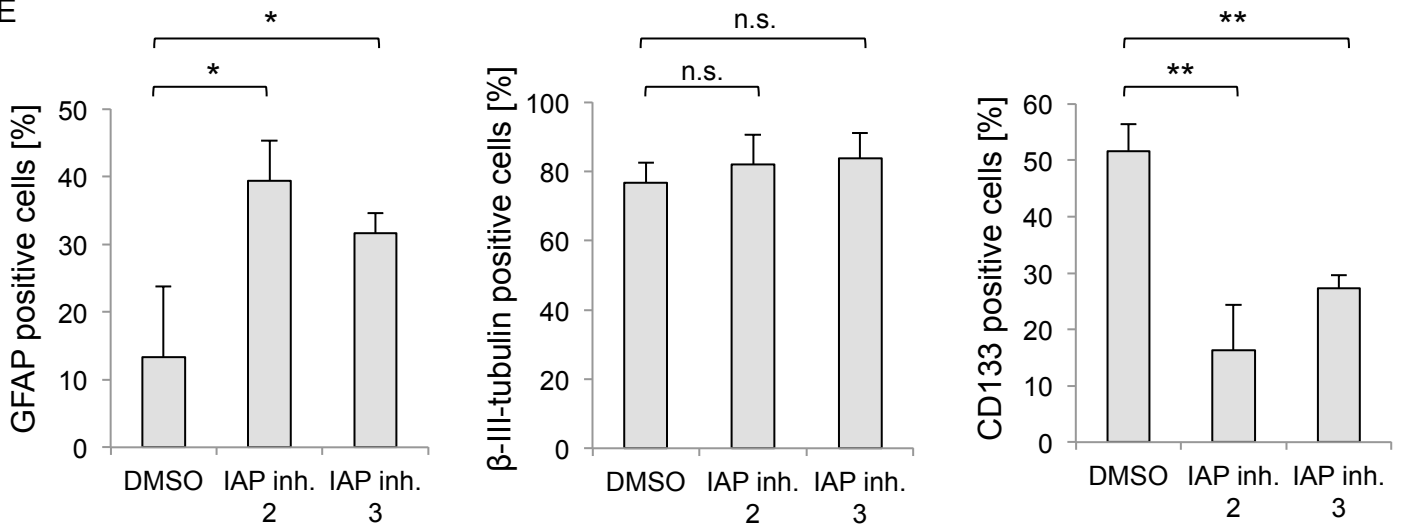

Supplement: cdd2013200x1.pdf [file cdd2013200x1.pdf]
