# Supplementary material
Source: PubMed Central journal article supplement (PMC3978303)
Supplement: cdd2013200x3.pdf [file cdd2013200x3.pdf]

**Supplementary Table 1:**

Primer sequences and annealing temperatures

| Gene  | Primer sequence                               | Annealing temperature (°C) |
|-------|-----------------------------------------------|----------------------------|
| NES   | AACAGCGACGGAGGTCTCTA<br>TTCTCTTGTCCTCCGCACTT  | 60.0                       |
| CD133 | TTGCTGCTTGTGGAATAGACA<br>AGGACTCGTTGCTGGTGAAT | 60.0                       |
| Sox2  | AACCAAGACGCTCATGAAGAA<br>GTACTGCAGGGCGCTCAC   | 60.0                       |
| Nanog | TAGCAATGGTGTGACGCA<br>AAGAGTAAAGGTGTGACGCA    | 60.0                       |
| GFAP  | GGAACATCGTGGTGAAGACC<br>AGAGGCGGAGCAACTATCCT  | 62.0                       |
| 18s   | CGCAAATTACCCACTCCCG<br>TTCCAATTACAGGGCCTCGAA  | 60.0                       |
